# Supplementary material for: Specific polar subpopulations of astral microtubules control spindle orientation and symmetric neural stem cell division
Source: eLife journal article supplement (doi:10.7554/elife.02875), 2014-07-04
Supplement: supp [file elife-02875-supp-v1.zip]

## Supplementary File 1

**Table with the values for the graphs in Figure 7: Key spindle and cell features in neural progenitors are not altered by 30 pM nocodazole.**

|                     | Spindle area ( $\mu\text{m}^2$ )                        |             | Normalized fluorescence intensity |             |
|---------------------|---------------------------------------------------------|-------------|-----------------------------------|-------------|
|                     | Tis21::GFP–                                             | Tis21::GFP+ | Tis21::GFP–                       | Tis21::GFP+ |
| <b>no treatment</b> | 38.44±2.68                                              | 35.68±1.40  | 0.72±0.062                        | 0.66±0.046  |
| <b>Control</b>      | 36.87±1.69                                              | 36.56±2.34  | 0.69±0.064                        | 0.67±0.057  |
| <b>Noc 30 pM</b>    | 35.17±2.40                                              | 35.68±2.53  | 0.70±0.058                        | 0.68±0.050  |
|                     |                                                         |             |                                   |             |
|                     | Normalized standard deviation of fluorescence intensity |             | Cell diameter ( $\mu\text{m}$ )   |             |
|                     | Tis21::GFP–                                             | Tis21::GFP+ | Tis21::GFP–                       | Tis21::GFP+ |
| <b>no treatment</b> | 0.62±0.025                                              | 0.61±0.029  | 6.69±0.37                         | 7.10±0.29   |
| <b>Control</b>      | 0.61±0.043                                              | 0.63±0.030  | 8.12±0.35                         | 8.01±0.62   |
| <b>Noc 30 pM</b>    | 0.60±0.037                                              | 0.58±0.014  | 6.86±0.48                         | 7.79±0.69   |

Values are given as mean±SEM.
